# Supplementary material for: Liquid Crystalline and Gel Properties of Luminescent Cyclometalated Palladium Complexes with Benzoylthiourea Ligands
Source: MDPI journal article supplement (doi:10.3390/gels9100777), 2023-09-25
Supplement: s1 [file s1]

# Liquid crystalline and gel properties of luminescent cyclometalated palladium complexes with benzoylthiourea ligands

Theodora A. Ilincă <sup>1</sup>, Monica Iliș <sup>1</sup>, Marin Micutz <sup>2</sup> and Viorel Cîrcu <sup>1,\*</sup>

<sup>1</sup> Department of Inorganic and Organic Chemistry, Biochemistry and Catalysis, University of Bucharest, 4-12 Regina Elisabeta Blvd., Sector 5, 030018 Bucharest, Romania;

<sup>2</sup> Department of Analytical and Physical Chemistry, University of Bucharest, 4-12 Regina Elisabeta Blvd., Sector 5, 030018 Bucharest, Romania; micutz@gw-chimie.math.unibuc.ro

\* Correspondence: viorel.circu@chimie.unibuc.ro

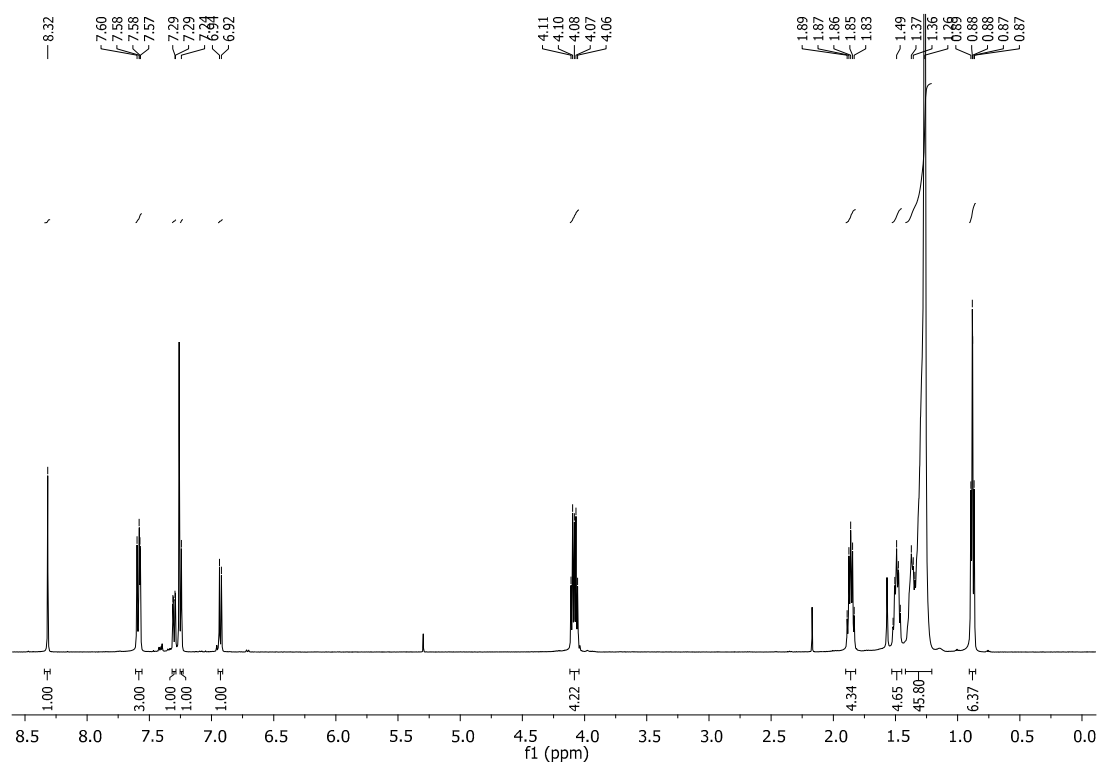

Figure S1. <sup>1</sup>H-NMR spectrum for compound 2.

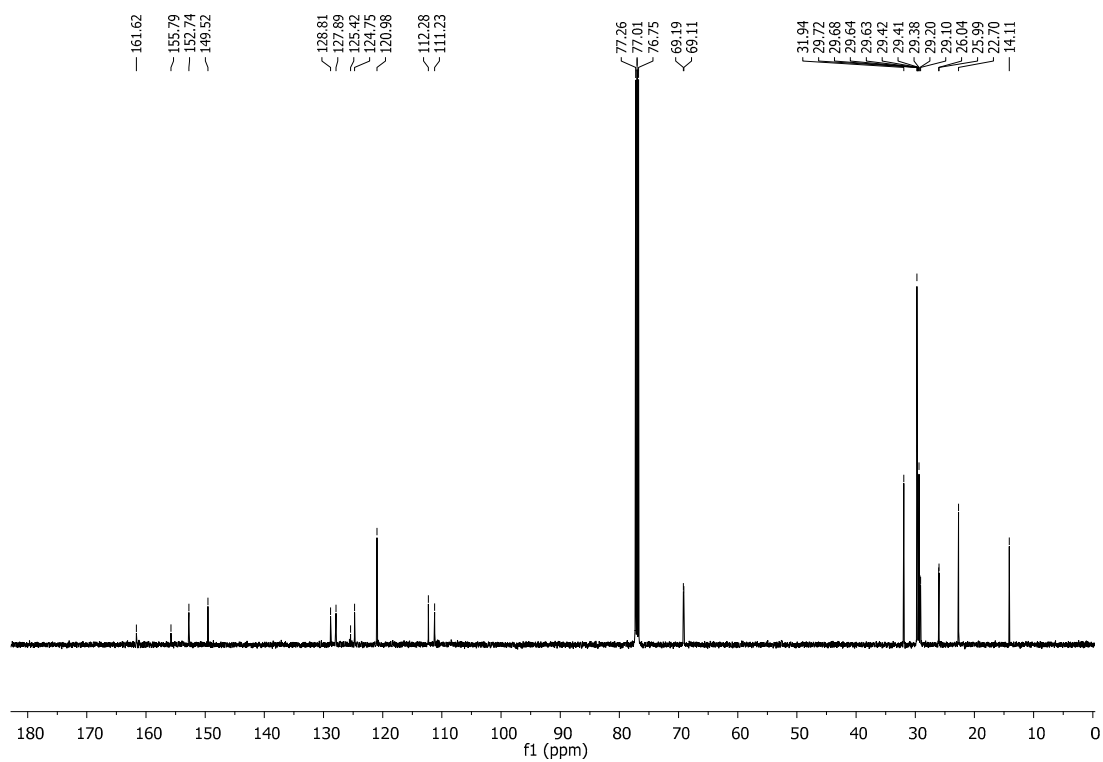

Figure S2.  $^{13}\text{C}$ -NMR spectrum for compound 2.

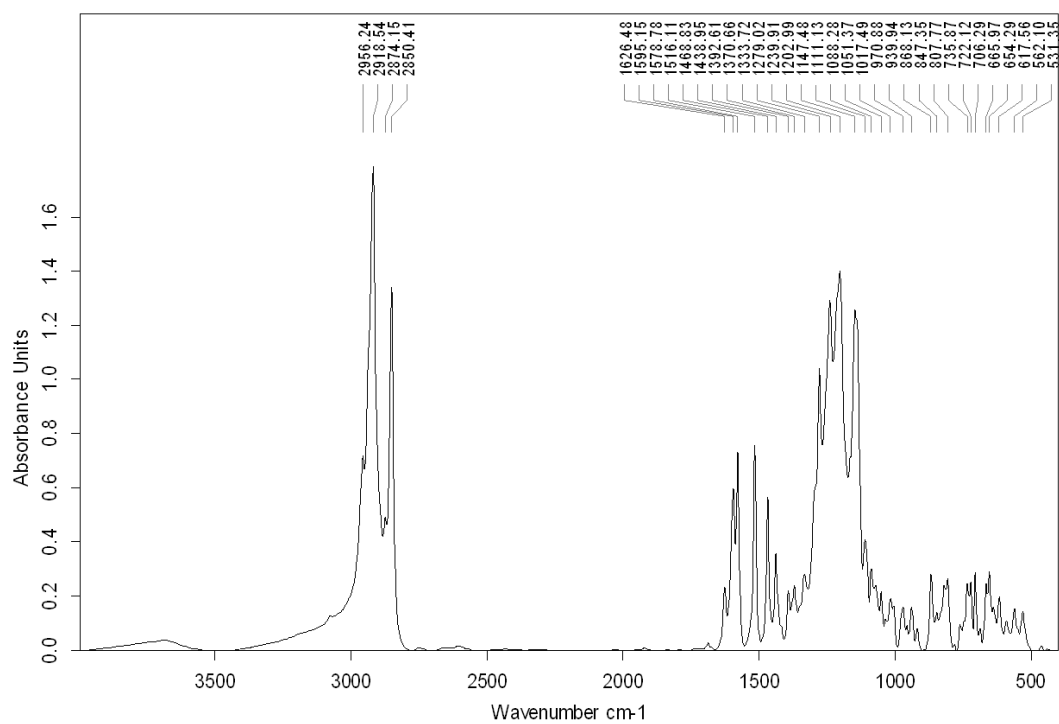

Figure S3. IR spectrum for compound 2.

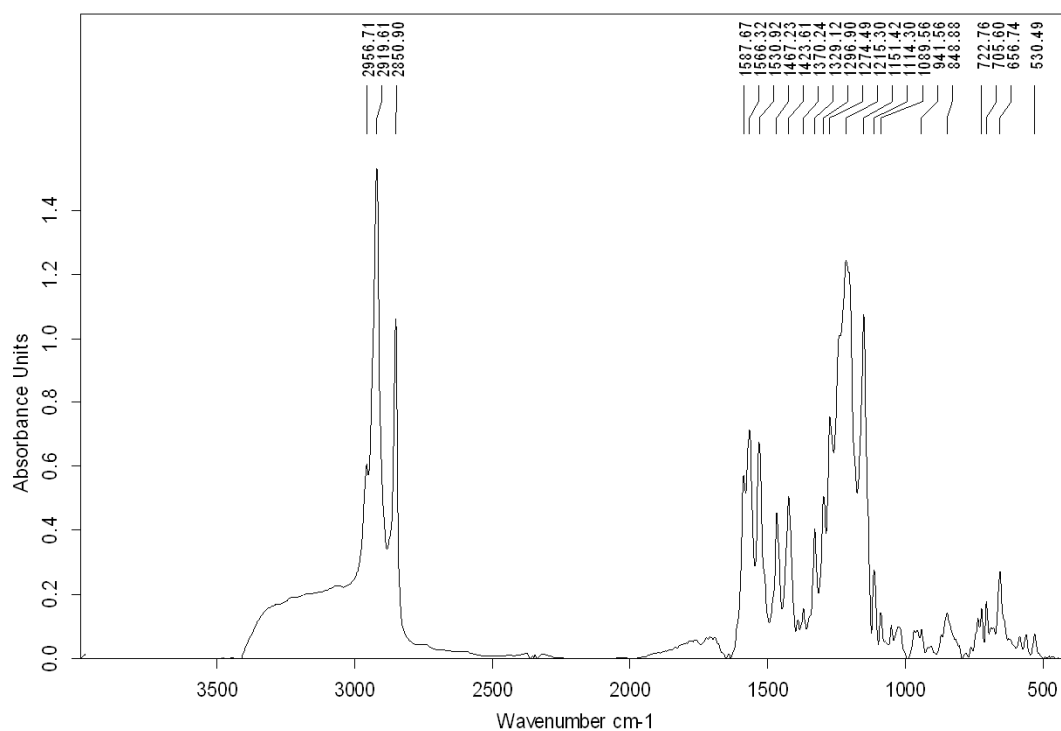

Figure S4. IR spectrum for compound 3.

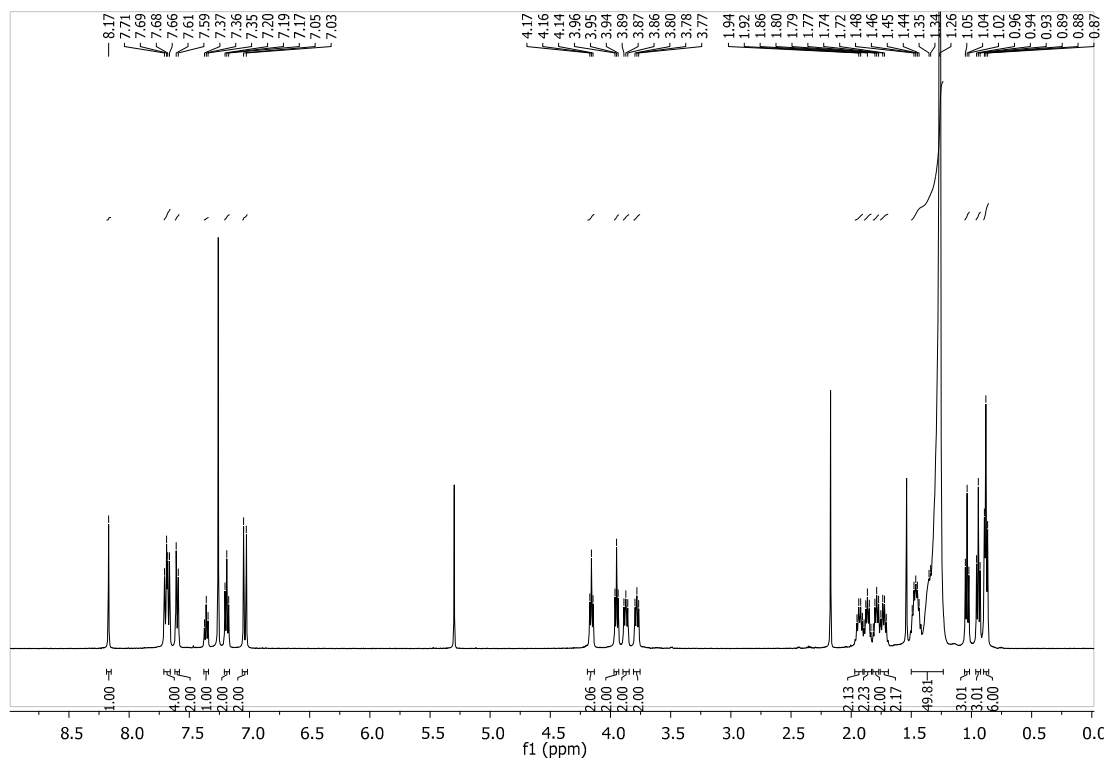

Figure S5. <sup>1</sup>H-NMR spectrum for compound 4-Pr.

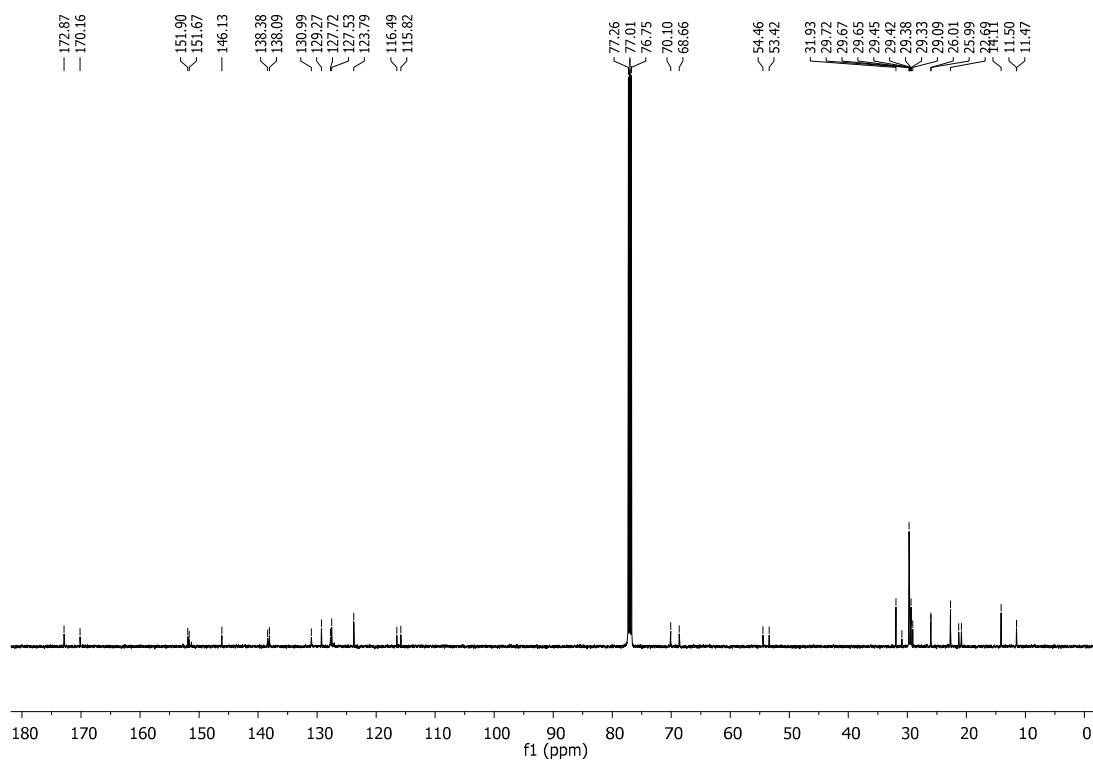

Figure S6. <sup>13</sup>C-NMR spectrum for compound **4-Pr**.

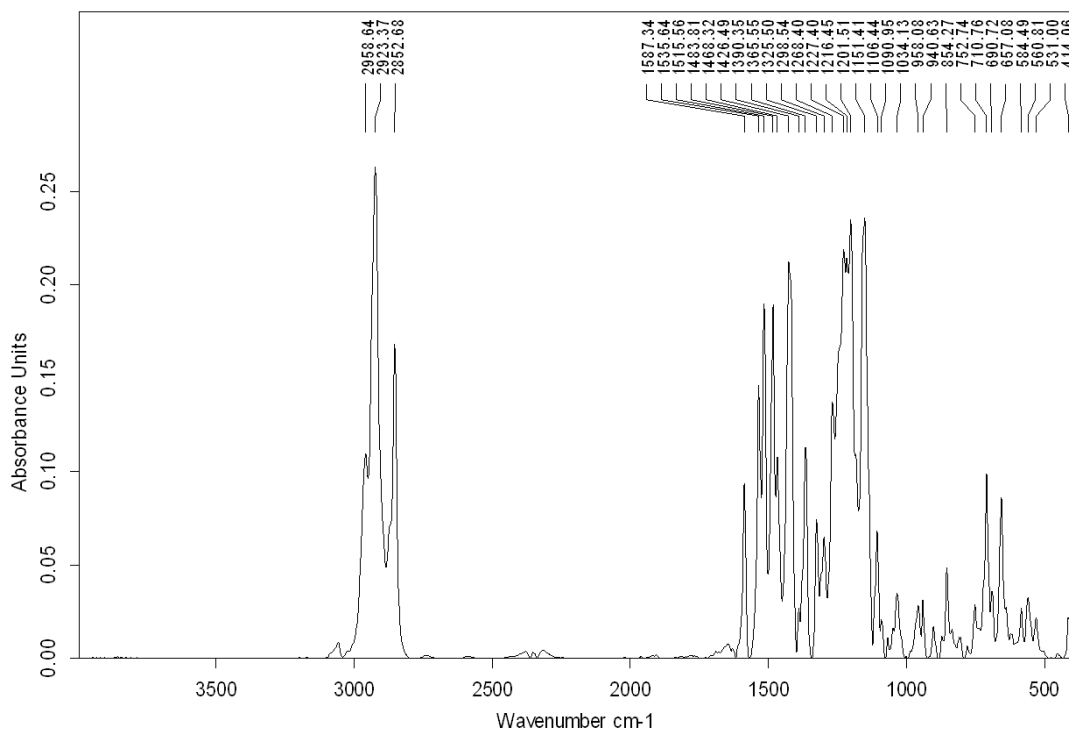

Figure S7. IR spectrum for compound **4-Pr**.

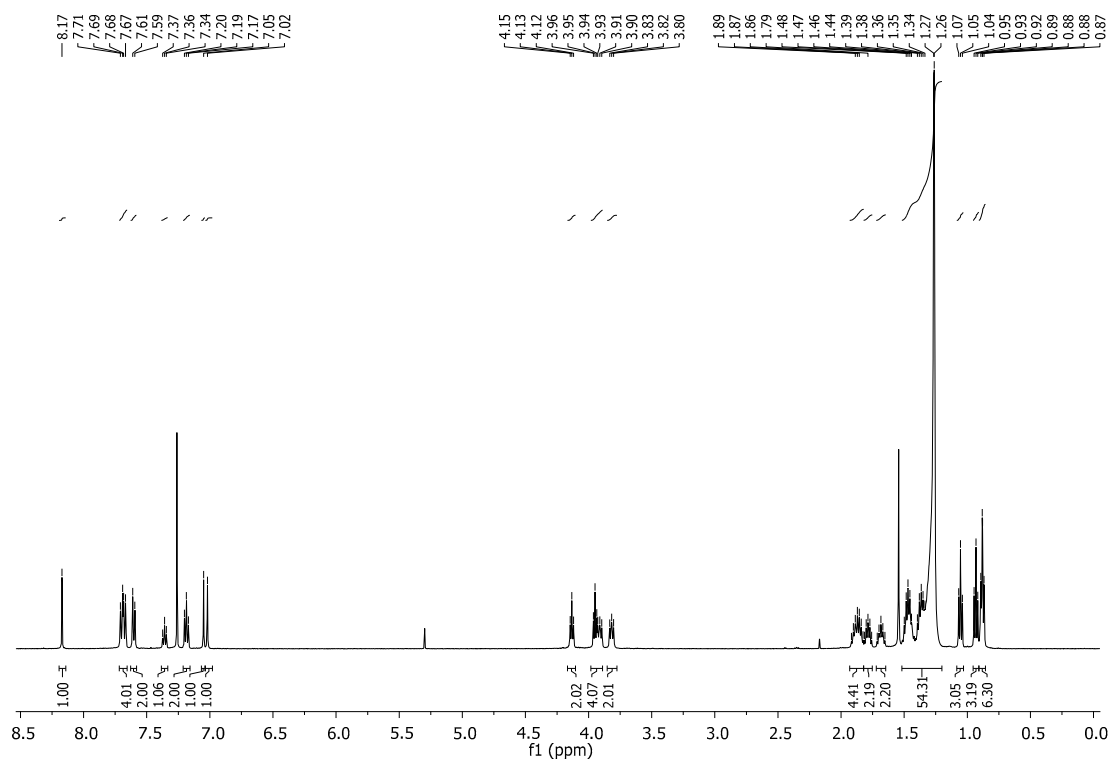

Figure S8. <sup>1</sup>H-NMR spectrum for compound 4-Bu.

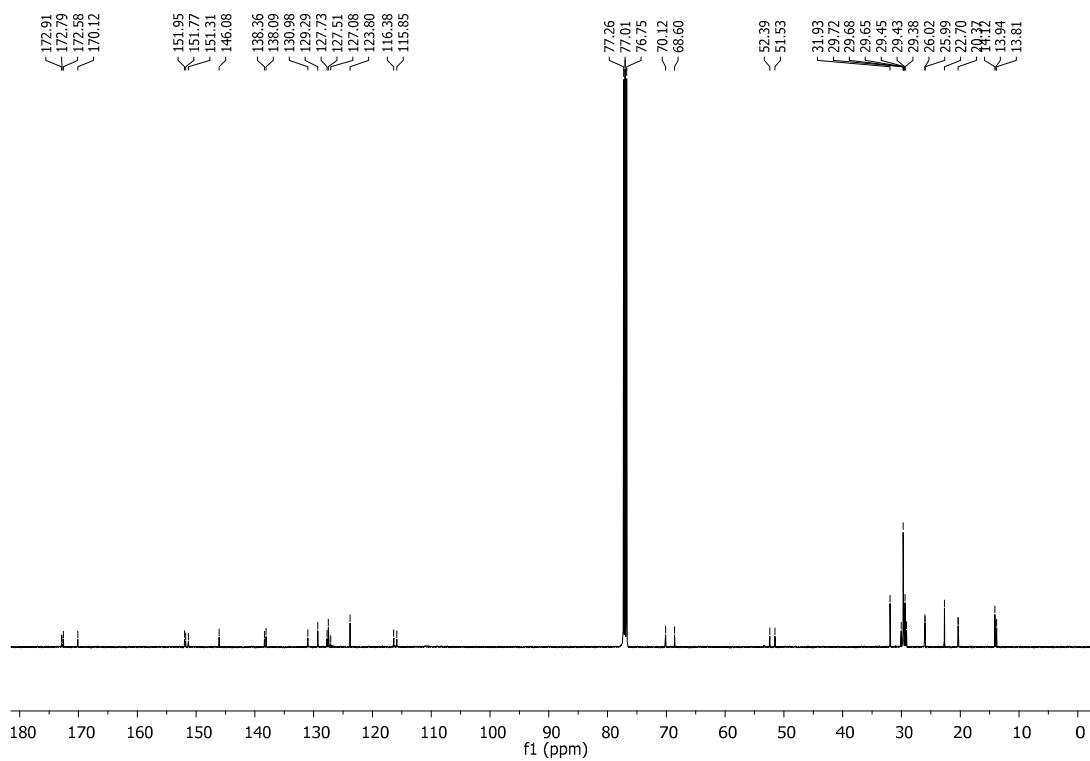

Figure S9. <sup>13</sup>C-NMR spectrum for compound 4-Bu.

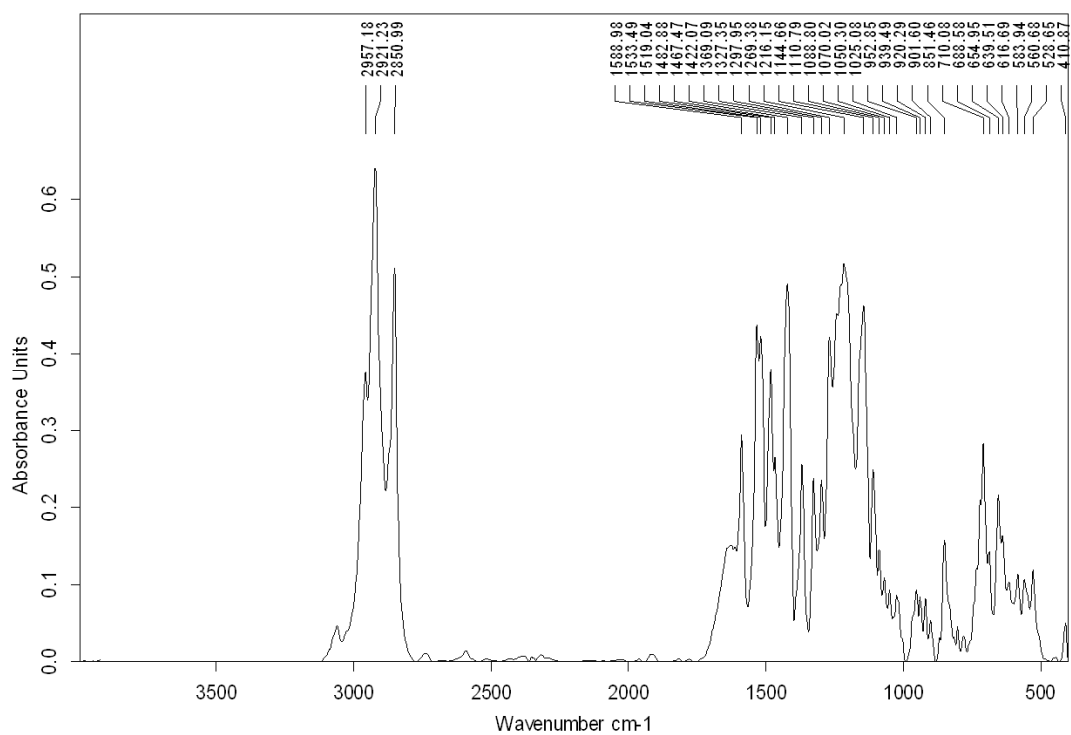

Figure S10. IR spectrum for compound **4-Bu**.

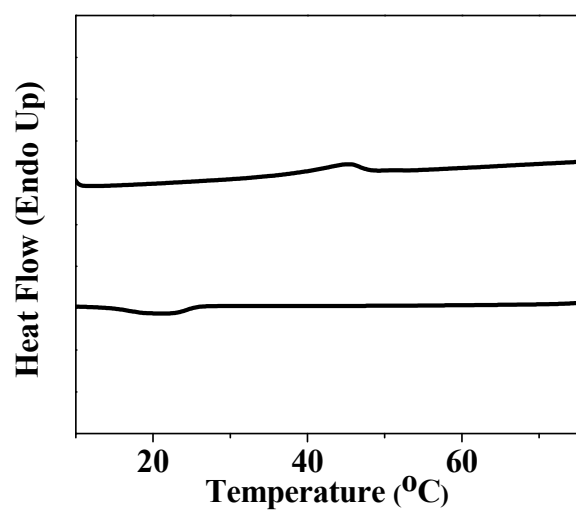

Figure S11. DSC trace for **4-Bu** 5% in 1-decanol.

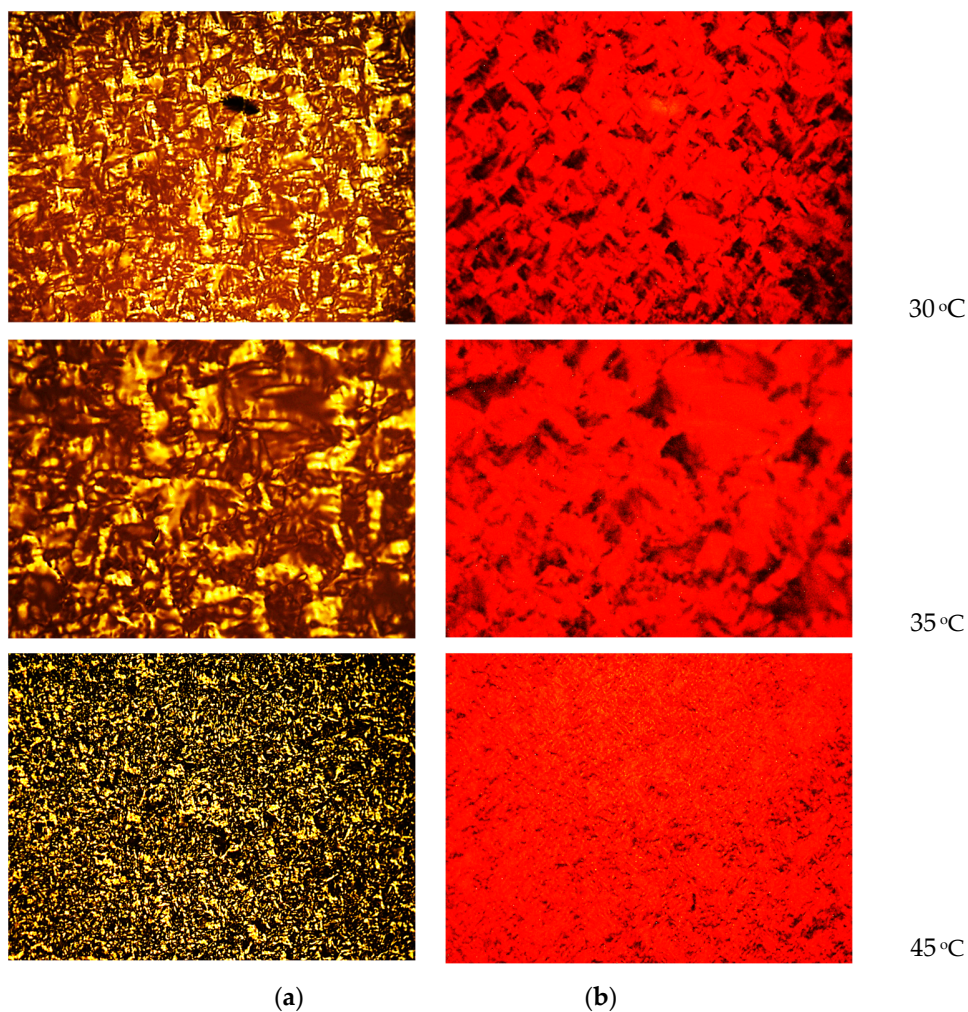

**Figure S12.** Lyotropic liquid crystal phase of compound **4-Pr** (15% gel) (a) under normal light and (b) under UV light at different temperatures.

Table S1. Crossover points, relationships between the viscoelastic moduli and dynamic viscosities (at 10 Hz) for the compounds **4-Pr** and **4-Bu** (dissolved in 1-decanol).

| t, °C     | Sample                       |                                                         |         |                                                         |                              |                                                                     |         |                                                         |
|-----------|------------------------------|---------------------------------------------------------|---------|---------------------------------------------------------|------------------------------|---------------------------------------------------------------------|---------|---------------------------------------------------------|
|           | 4-Pr in 1-decanol (50 mg/mL) |                                                         |         |                                                         | 4-Bu in 1-decanol (50 mg/mL) |                                                                     |         |                                                         |
|           | Heating                      |                                                         | Cooling |                                                         | Heating                      |                                                                     | Cooling |                                                         |
|           | COP, Hz                      | Obs.                                                    | COP, Hz | Obs.                                                    | COP, Hz                      | Obs.                                                                | COP, Hz | Obs.                                                    |
| <b>5</b>  | -                            | G'≈G''<br>( $\eta_{\text{dyn}}$ =1.08 Pa·s<br>at 10 Hz) | -       | G'>G''<br>( $\eta_{\text{dyn}}$ =2.69 Pa·s<br>at 10 Hz) | ~2                           | G'>G'' at<br>f>COP<br>( $\eta_{\text{dyn}}$ =5.27 Pa·s<br>at 10 Hz) | -       | G'>G''<br>( $\eta_{\text{dyn}}$ =1.97 Pa·s<br>at 10 Hz) |
| <b>10</b> | -                            | G'≈G''<br>( $\eta_{\text{dyn}}$ =1.19 Pa·s)             | ~1.5    | G'>G'' at<br>f>COP                                      | ~1.5                         | G'>G'' at<br>f>COP                                                  | -       | G'>G''<br>( $\eta_{\text{dyn}}$ =1.99 Pa·s)             |

|           |      |                                                                    |      |                                                                    |      |                                                                    |      |                                                                    |
|-----------|------|--------------------------------------------------------------------|------|--------------------------------------------------------------------|------|--------------------------------------------------------------------|------|--------------------------------------------------------------------|
|           |      | at 10 Hz)                                                          |      | ( $\eta_{\text{dyn}}=3.36$ Pa·s<br>at 10 Hz)                       |      | ( $\eta_{\text{dyn}}=5.94$ Pa·s<br>at 10 Hz)                       |      | at 10 Hz)                                                          |
| <b>15</b> | -    | G'>G''<br>( $\eta_{\text{dyn}}=1.20$ Pa·s<br>at 10 Hz)             | -    | G'>G''<br>( $\eta_{\text{dyn}}=3.59$ Pa·s<br>at 10 Hz)             | ~2   | G'>G'' at<br>f>COP<br>( $\eta_{\text{dyn}}=5.47$ Pa·s<br>at 10 Hz) | -    | G'>G''<br>( $\eta_{\text{dyn}}=1.99$ Pa·s<br>at 10 Hz)             |
| <b>20</b> | -    | G'>G''<br>( $\eta_{\text{dyn}}=1.64$ Pa·s<br>at 10 Hz)             | ~0.5 | G'>G'' at<br>f>COP<br>( $\eta_{\text{dyn}}=3.55$ Pa·s<br>at 10 Hz) | ~2.5 | G'>G'' at<br>f>COP<br>( $\eta_{\text{dyn}}=5.65$ Pa·s<br>at 10 Hz) | -    | G'>G''<br>( $\eta_{\text{dyn}}=1.95$ Pa·s<br>at 10 Hz)             |
| <b>25</b> | ~2   | G'>G'' at<br>f>COP<br>( $\eta_{\text{dyn}}=1.85$ Pa·s<br>at 10 Hz) | ~0.5 | G'>G'' at<br>f>COP<br>( $\eta_{\text{dyn}}=3.49$ Pa·s<br>at 10 Hz) | ~3   | G'>G'' at<br>f>COP<br>( $\eta_{\text{dyn}}=5.66$ Pa·s<br>at 10 Hz) | -    | G'>G''<br>( $\eta_{\text{dyn}}=1.99$ Pa·s<br>at 10 Hz)             |
| <b>30</b> | ~1   | G'>G'' at<br>f>COP<br>( $\eta_{\text{dyn}}=2.16$ Pa·s<br>at 10 Hz) | ~0.5 | G'>G'' at<br>f>COP<br>( $\eta_{\text{dyn}}=3.37$ Pa·s<br>at 10 Hz) | ~2   | G'>G'' at<br>f>COP<br>( $\eta_{\text{dyn}}=5.49$ Pa·s<br>at 10 Hz) | -    | G'>G''<br>( $\eta_{\text{dyn}}=1.94$ Pa·s<br>at 10 Hz)             |
| <b>35</b> | ~1.5 | G'>G'' at<br>f>COP<br>( $\eta_{\text{dyn}}=2.69$ Pa·s<br>at 10 Hz) | -    | G'>G''<br>( $\eta_{\text{dyn}}=3.36$ Pa·s<br>at 10 Hz)             | ~1   | G'>G'' at<br>f>COP<br>( $\eta_{\text{dyn}}=4.81$ Pa·s<br>at 10 Hz) | ~0.5 | G'>G'' at<br>f>COP<br>( $\eta_{\text{dyn}}=1.85$ Pa·s<br>at 10 Hz) |
| <b>40</b> | ~2   | G'>G'' at<br>f>COP<br>( $\eta_{\text{dyn}}=2.84$ Pa·s<br>at 10 Hz) | -    | G'>G''<br>( $\eta_{\text{dyn}}=3.41$ Pa·s<br>at 10 Hz)             | ~1   | G'>G'' at<br>f>COP<br>( $\eta_{\text{dyn}}=4.28$ Pa·s<br>at 10 Hz) | ~0.5 | G'>G'' at<br>f>COP<br>( $\eta_{\text{dyn}}=2.01$ Pa·s<br>at 10 Hz) |
| <b>45</b> | ~0.5 | G'>G'' at<br>f>COP<br>( $\eta_{\text{dyn}}=2.91$ Pa·s<br>at 10 Hz) | ~0.5 | G'>G'' at<br>f>COP<br>( $\eta_{\text{dyn}}=3.43$ Pa·s<br>at 10 Hz) | -    | G'>G''<br>( $\eta_{\text{dyn}}=4.34$ Pa·s<br>at 10 Hz)             | ~0.5 | G'>G'' at<br>f>COP<br>( $\eta_{\text{dyn}}=2.26$ Pa·s<br>at 10 Hz) |
| <b>50</b> | ~1   | G'>G'' at<br>f>COP<br>( $\eta_{\text{dyn}}=2.77$ Pa·s<br>at 10 Hz) | ~0.5 | G'>G'' at<br>f>COP<br>( $\eta_{\text{dyn}}=3.46$ Pa·s<br>at 10 Hz) | -    | G'>G''<br>( $\eta_{\text{dyn}}=2.89$ Pa·s<br>at 10 Hz)             | ~0.8 | G'>G'' at<br>f>COP<br>( $\eta_{\text{dyn}}=2.91$ Pa·s<br>at 10 Hz) |
| <b>55</b> | ~0.5 | G'>G'' at<br>f>COP<br>( $\eta_{\text{dyn}}=2.70$ Pa·s<br>at 10 Hz) | ~0.5 | G'>G'' at<br>f>COP<br>( $\eta_{\text{dyn}}=3.51$ Pa·s<br>at 10 Hz) | -    | G'>G''<br>( $\eta_{\text{dyn}}=1.65$ Pa·s<br>at 10 Hz)             | ~1   | G'>G'' at<br>f>COP<br>( $\eta_{\text{dyn}}=3.03$ Pa·s<br>at 10 Hz) |
| <b>60</b> | -    | G'>G''<br>( $\eta_{\text{dyn}}=2.55$ Pa·s<br>at 10 Hz)             | ~0.8 | G'>G'' at<br>f>COP<br>( $\eta_{\text{dyn}}=3.58$ Pa·s<br>at 10 Hz) | -    | G'>G''<br>( $\eta_{\text{dyn}}=2.03$ Pa·s<br>at 10 Hz)             | ~2   | G'>G'' at<br>f>COP<br>( $\eta_{\text{dyn}}=1.85$ Pa·s<br>at 10 Hz) |
| <b>65</b> | ~1   | G'>G'' at<br>f>COP<br>( $\eta_{\text{dyn}}=2.49$ Pa·s<br>at 10 Hz) | ~0.8 | G'>G'' at<br>f>COP<br>( $\eta_{\text{dyn}}=3.59$ Pa·s<br>at 10 Hz) | ~0.5 | G'>G'' at<br>f>COP<br>( $\eta_{\text{dyn}}=1.27$ Pa·s<br>at 10 Hz) | -    | G''>G'<br>( $\eta_{\text{dyn}}=0.71$ Pa·s<br>at 10 Hz)             |
| <b>70</b> | ~1   | G'>G'' at<br>f>COP<br>( $\eta_{\text{dyn}}=2.50$ Pa·s<br>at 10 Hz) | ~0.8 | G'>G'' at<br>f>COP<br>( $\eta_{\text{dyn}}=3.59$ Pa·s<br>at 10 Hz) | -    | G''>G'<br>( $\eta_{\text{dyn}}=0.55$ Pa·s<br>at 10 Hz)             | ~1.5 | G''>G at<br>f>COP<br>( $\eta_{\text{dyn}}=0.13$ Pa·s<br>at 10 Hz)  |



|           |     |                                                                                                |    |                                                                                                |      |                                                                                                |      |                                                                                                |
|-----------|-----|------------------------------------------------------------------------------------------------|----|------------------------------------------------------------------------------------------------|------|------------------------------------------------------------------------------------------------|------|------------------------------------------------------------------------------------------------|
|           |     | at 10 Hz)                                                                                      |    | at 10 Hz)                                                                                      |      |                                                                                                |      | at 10 Hz)                                                                                      |
| <b>75</b> | ~5  | $G' > G''$ at $f > \text{COP}$<br>( $\eta_{\text{dyn}}=2.23 \text{ Pa}\cdot\text{s}$ at 10 Hz) | ~1 | $G' > G''$ at $f > \text{COP}$<br>( $\eta_{\text{dyn}}=3.66 \text{ Pa}\cdot\text{s}$ at 10 Hz) | ~3.5 | $G'' > G'$ at $f > \text{COP}$<br>( $\eta_{\text{dyn}}=0.09 \text{ Pa}\cdot\text{s}$ at 10 Hz) | -    | $G'' > G'$<br>( $\eta_{\text{dyn}}=0.03 \text{ Pa}\cdot\text{s}$ at 10 Hz)                     |
| <b>80</b> | ~15 | $G' > G''$ at $f > \text{COP}$<br>( $\eta_{\text{dyn}}=1.53 \text{ Pa}\cdot\text{s}$ at 10 Hz) | ~6 | $G' > G''$ at $f > \text{COP}$<br>( $\eta_{\text{dyn}}=3.10 \text{ Pa}\cdot\text{s}$ at 10 Hz) | ~5.5 | $G'' > G'$ at $f > \text{COP}$<br>( $\eta_{\text{dyn}}=0.02 \text{ Pa}\cdot\text{s}$ at 10 Hz) | ~5.5 | $G'' > G'$ at $f > \text{COP}$<br>( $\eta_{\text{dyn}}=0.02 \text{ Pa}\cdot\text{s}$ at 10 Hz) |
| <b>85</b> | -   | $G'' > G'$<br>( $\eta_{\text{dyn}}=0.79 \text{ Pa}\cdot\text{s}$ at 10 Hz)                     | -  | $G'' > G'$<br>( $\eta_{\text{dyn}}=0.87 \text{ Pa}\cdot\text{s}$ at 10 Hz)                     |      |                                                                                                |      |                                                                                                |
| <b>90</b> | -   | $G'' > G'$<br>( $\eta_{\text{dyn}}=0.12 \text{ Pa}\cdot\text{s}$ at 10 Hz)                     | -  | $G'' > G'$<br>( $\eta_{\text{dyn}}=0.12 \text{ Pa}\cdot\text{s}$ at 10 Hz)                     |      |                                                                                                |      |                                                                                                |

*COP* – crossover point; *f* – frequency;  $\eta_{\text{dyn}}$  – dynamic viscosity;  $G' > G''$  – system exhibiting preponderantly gel-like behavior (PGLB);  $G'' > G'$  – system exhibiting preponderantly liquid-like behavior (PLLB)

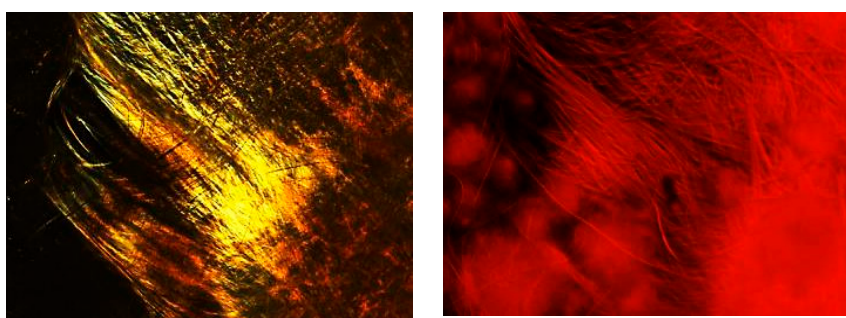

**Figure S13.** Gel morphology revealed by POM for compound **4-Pr** in (a) natural light and (b) under UV light (images taken during the gelation process at 25°C for DeOH-based gels containing 50 mg/mL).
